# Supplementary material for: Effect of Patient Financial Incentives on Statin Adherence and Lipid Control: A Randomized Clinical Trial
Source: PubMed Central journal article supplement (PMC7547367; doi:10.1001/jamanetworkopen.2020.19429), 2020-10-09
Supplement: jamanetwopen-e2019429-s003.pdf [file jamanetwopen-e2019429-s003.pdf]

## Data Sharing Statement

Barankay. Effect of Patient Financial Incentives on Statin Adherence and Lipid Control. *JAMA Netw Open*. Published October 09, 2020. 10.1001/jamanetworkopen.2020.19429

### Data

**Data available:** Yes

**Data types:** Deidentified participant data

**How to access data:** [barankay@upenn.edu](mailto:barankay@upenn.edu)

**When available:** With publication

### Supporting Documents

**Document types:** None

### Additional Information

**Who can access the data:** Researchers whose proposed use of the data has been approved

**Types of analyses:** For any reasonable purpose.

**Mechanisms of data availability:** After approval of a proposal.
